# Supplementary material for: Green and efficient synthesis of pyranopyrazoles using [bmim][OH−] as an ionic liquid catalyst in water under microwave irradiation and investigation of their antioxidant activity
Source: Royal Society of Chemistry journal article supplement (doi:10.1039/c6ra17594e), 2016-01-01
Supplement: c6ra17594e1.pdf [file c6ra17594e1.pdf]

## Green and efficient synthesis of pyranopyrazoles using [bmim][OH<sup>-</sup>] as an ionic liquid catalyst in water under microwave irradiation and investigation of their antioxidant activity

Roghayeh Sharifi Aliabadi<sup>a</sup>, Nosrat. O. Mahmoodi<sup>a</sup>

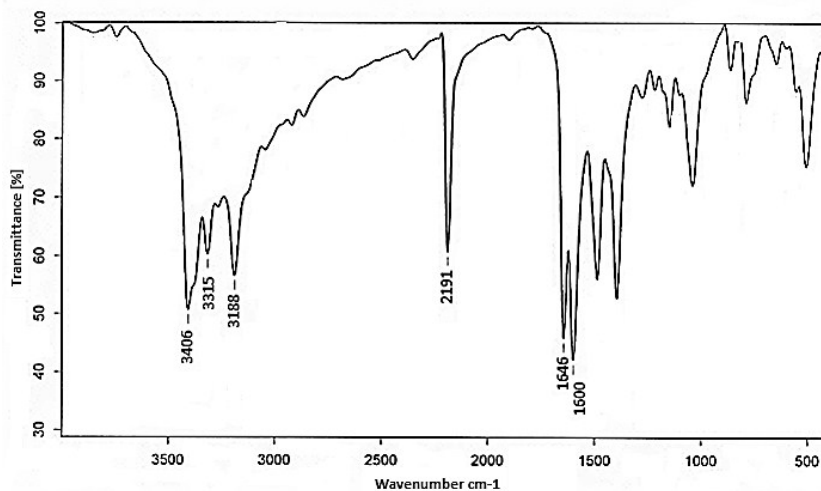

Figure 1. Ft.IR spectrum of 6-amino-3-methyl-4-(p-tolyl)-1,4-dihydropyrano[2,3-c]pyrazole-5-carbonitrile (4a)

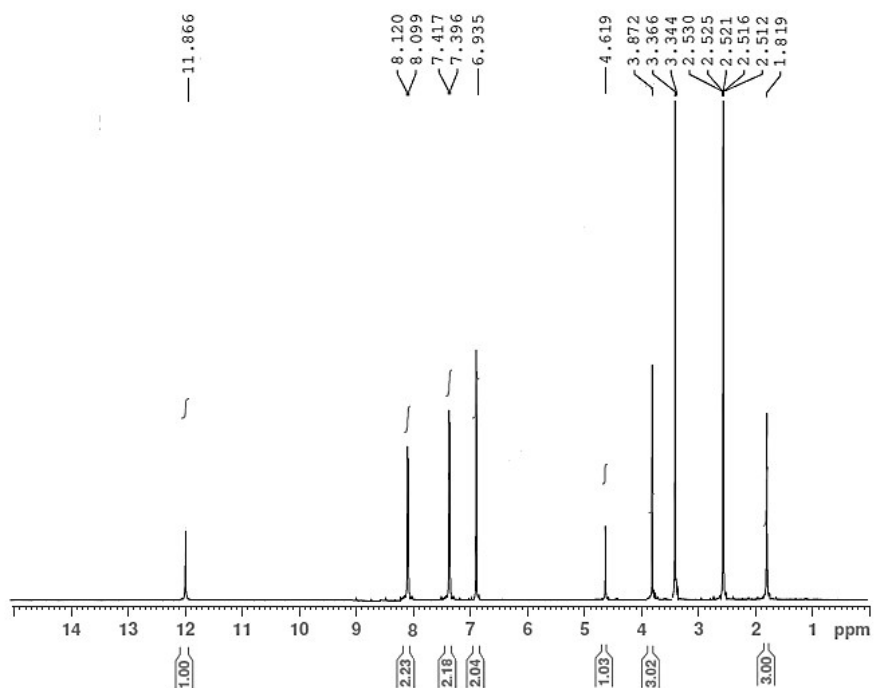

Figure 2. <sup>1</sup>H-NMR spectrum of 6-amino-3-methyl-4-(p-tolyl)-1,4-dihydropyrano[2,3-c]pyrazole-5-carbonitrile (4a)

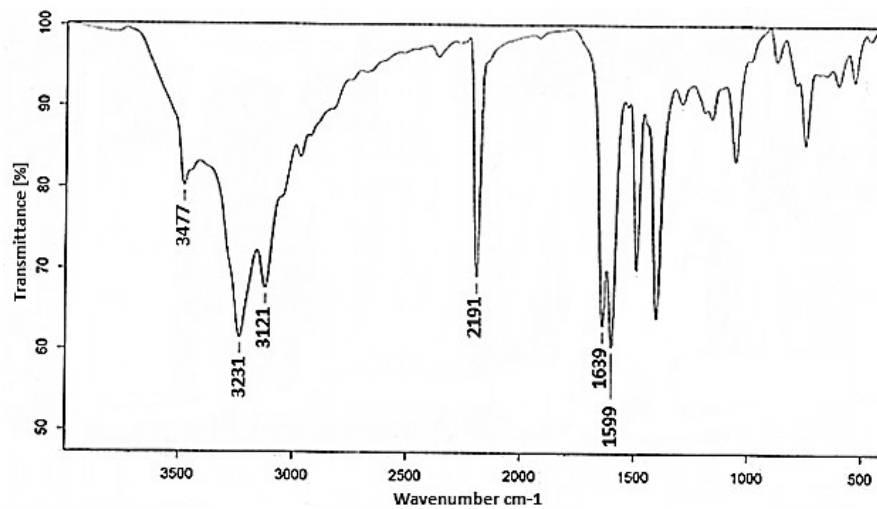

Figure 3. Ft.IR spectrum of 6-amino-1,4-dihydro-3-methyl-4-phenylpyrano[2,3-c]pyrazole-5-carbonitrile (4b)

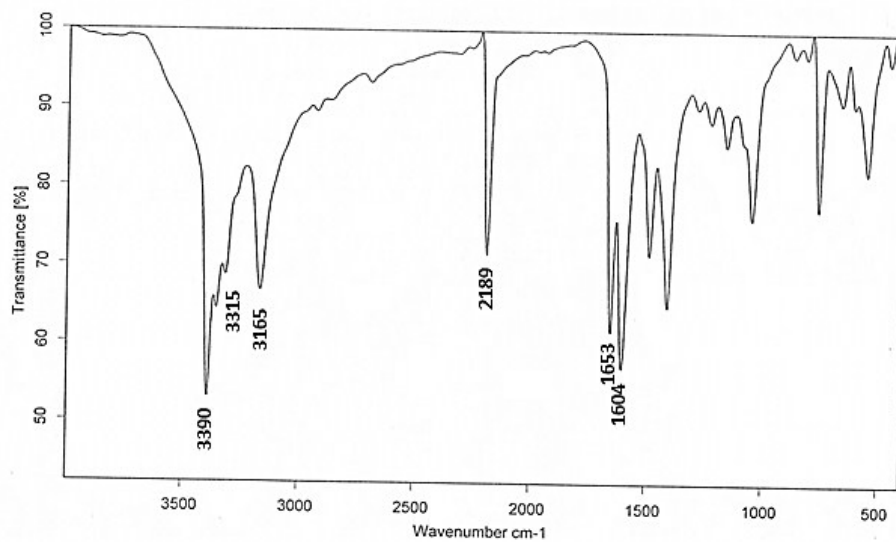

Figure 4. Ft.IR spectrum of 6-amino-4-(2-chlorophenyl)-3-methyl-1,4-dihydropyrano[2,3-c]pyrazole-5-carbonitrile (4c)

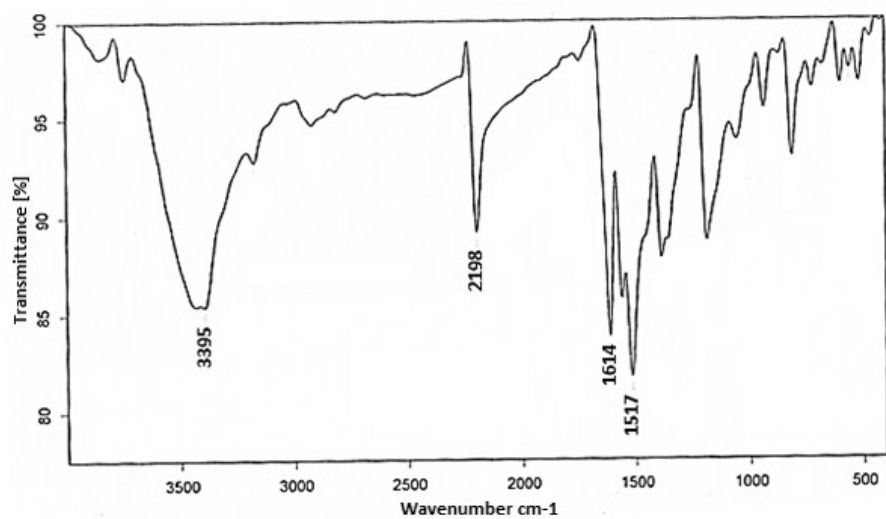

Figure 5. Ft.IR spectrum of 6-amino-4-(4-(dimethylamino)phenyl)-3-methyl-1,4-dihydropyrano[2,3-c]pyrazole-5-carbonitrile (4d)

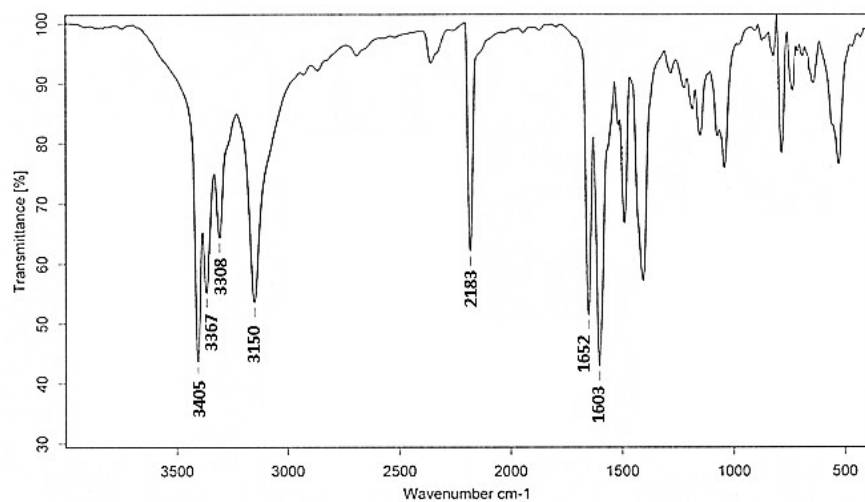

Figure 6. Ft.IR spectrum of 6-amino-4-(4-hydroxyphenyl)-3-methyl-1,4-dihydropyrano[2,3-c]pyrazole-5-carbonitrile (4e)

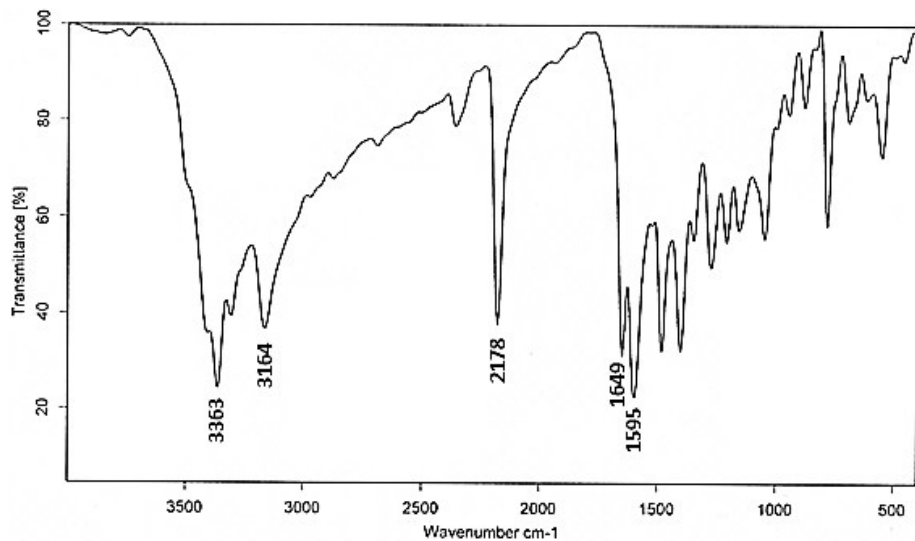

Figure 7. Ft.IR spectrum of 6-amino-4-(3-hydroxyphenyl)-3-methyl-1,4-dihydropyrano[2,3-c]pyrazole-5-carbonitrile (4f)

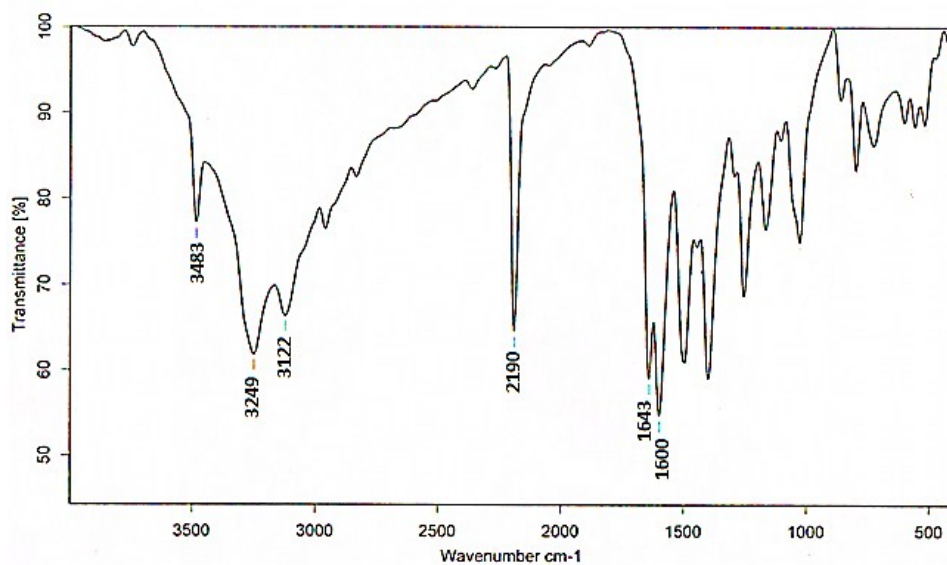

Figure 8. Ft.IR spectrum of 6-amino-4-(4-methoxyphenyl)-3-methyl-1,4-dihydropyrano[2,3-c]pyrazole-5-carbonitrile (4g)

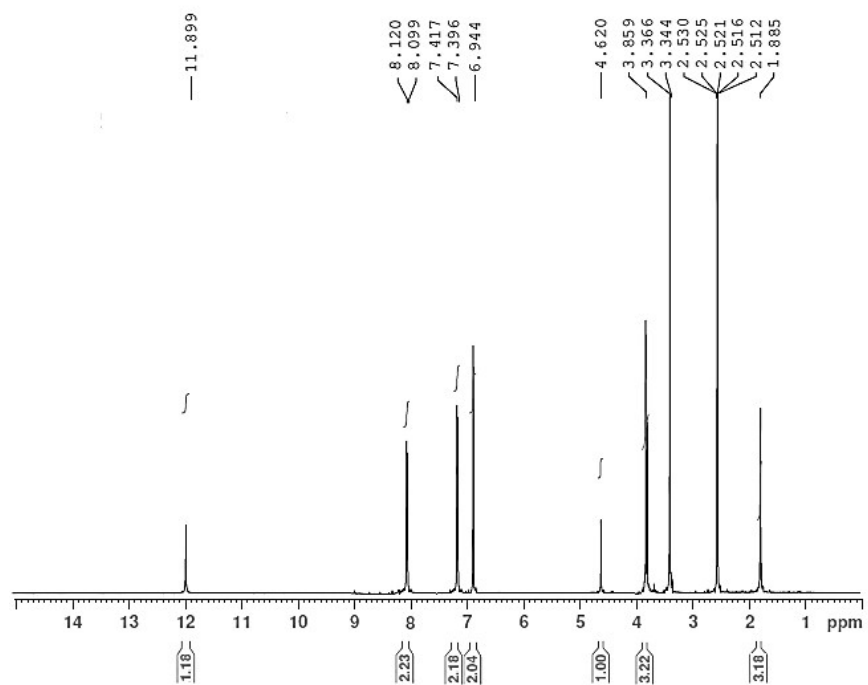

Figure 9. <sup>1</sup>H NMR spectrum of 6-amino-4-(4-methoxyphenyl)-3-methyl-1,4-dihydropyranopyrazole-5-carbonitrile (4g)

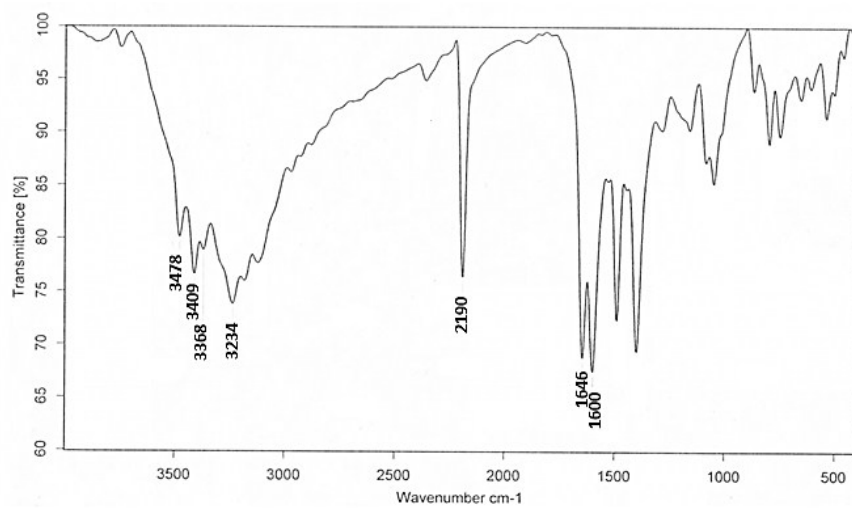

Figure 10. FT-IR spectrum of 6-amino-4-(4-chlorophenyl)-3-methyl-1,4-dihydropyranopyrazole-5-carbonitrile (4h)

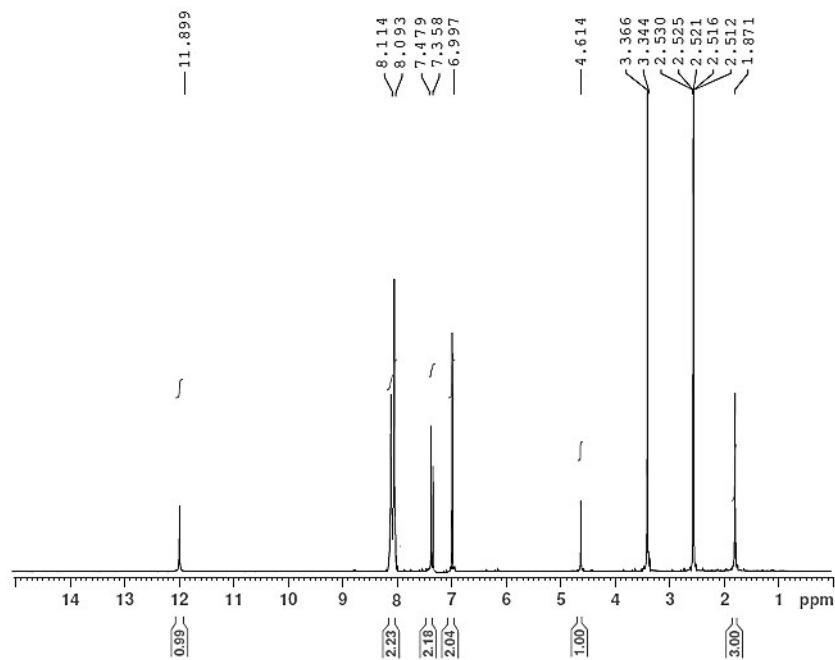

Figure 11. <sup>1</sup>H NMR spectrum of 6-amino-4-(4-chlorophenyl)-3-methyl-1,4-dihydropyranopyrazole-5-carbonitrile (4h)

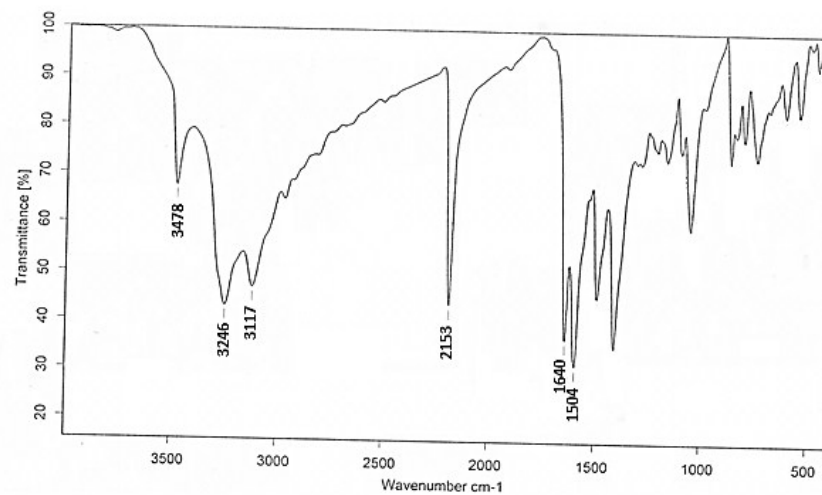

Figure 12. Ft. IR spectrum of 6-amino-4-(2,4-dichlorophenyl)-3-methyl-1,4-dihydropyranopyrazole-5-carbonitrile (4i)

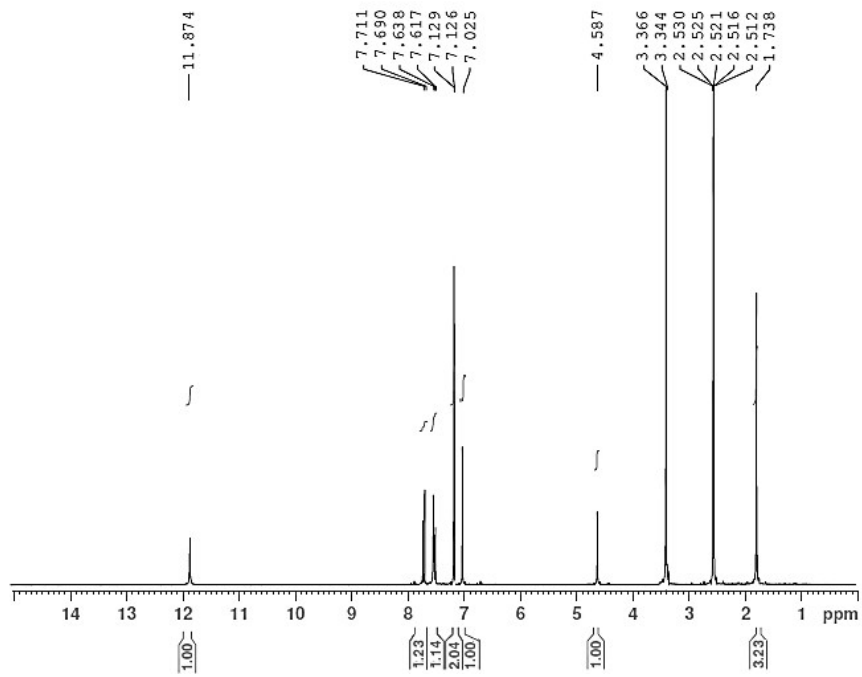

Figure 13. <sup>1</sup>H NMR spectrum of 6-amino-4-(2,4-dichlorophenyl)-3-methyl-1,4-dihydropyrano[2,3-c]pyrazole-5-carbonitrile (4i)

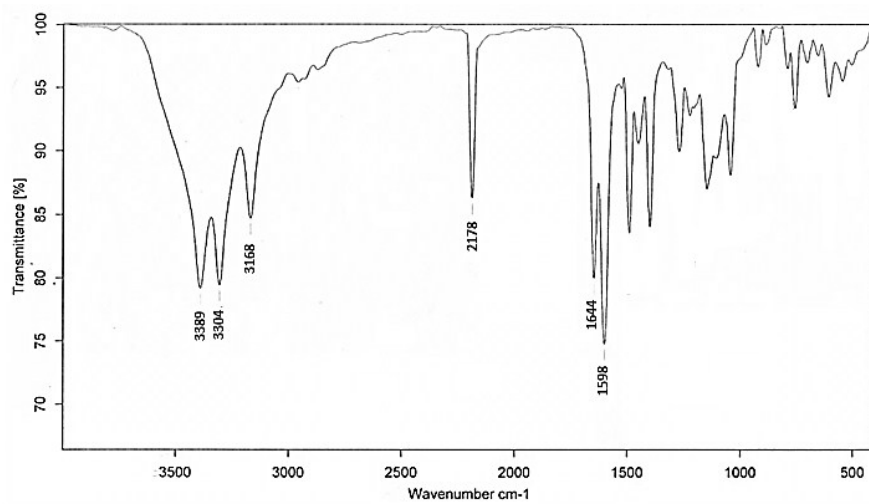

Figure 14. Ft. IR spectrum of 6-amino-4-(4-fluorophenyl)-3-methyl-1,4-dihydropyrano[2,3-c]pyrazole-5-carbonitrile (4j)

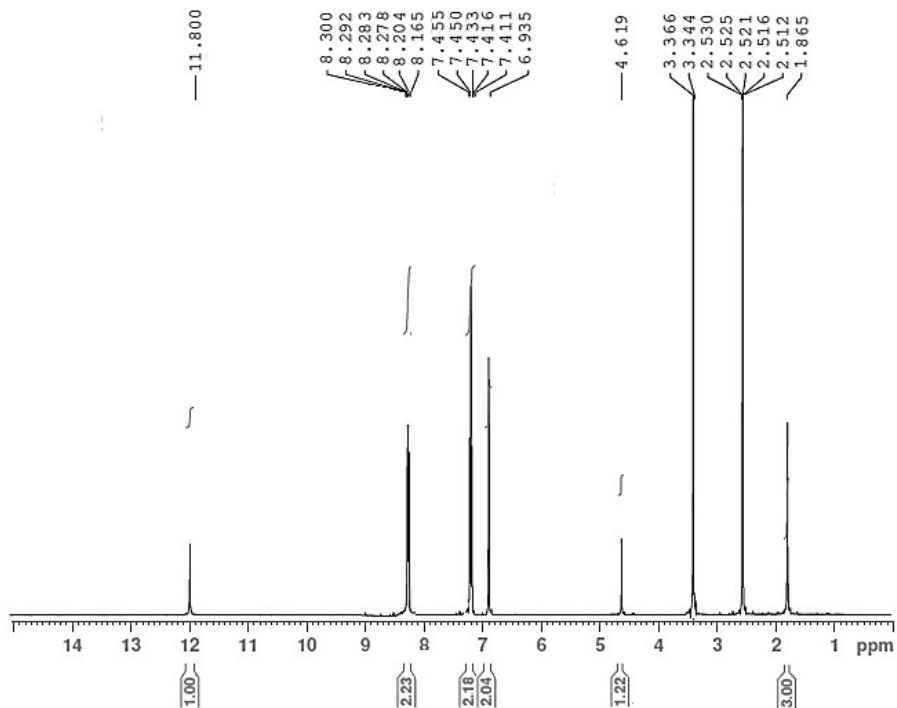

Figure 15. <sup>1</sup>H NMR spectrum of 6-amino-4-(4-fluorophenyl)-3-methyl-1,4-dihydropyrano[2,3-c]pyrazole-5-carbonitrile (4j)

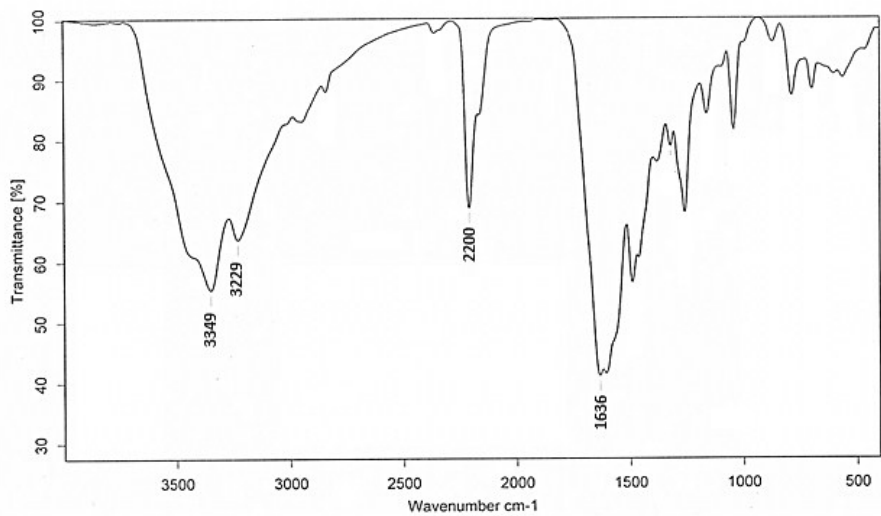

Figure 16. Ft. IR spectrum of 6-amino-4-(3-methoxyphenyl)-3-methyl-1,4-dihydropyrano[2,3-c]pyrazole-5-carbonitrile (4k)



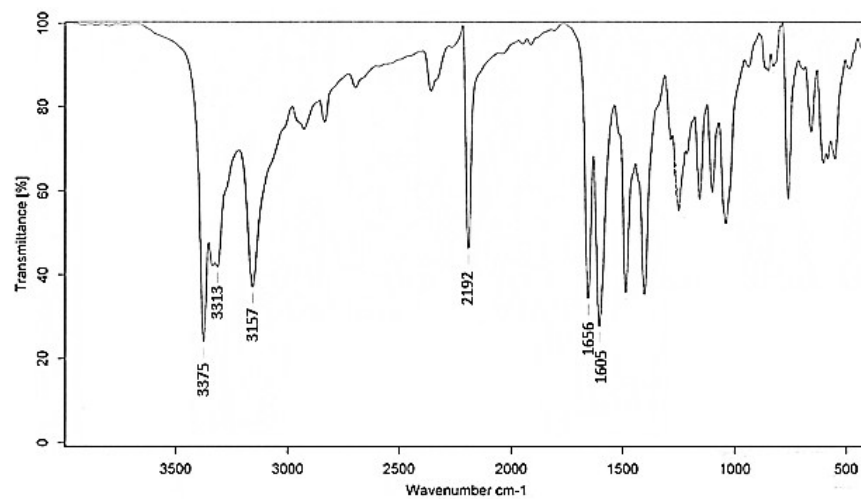

Figure 17. Ft.IR spectrum of 6-amino-4-(2-methoxyphenyl)-3-methyl-1,4-dihydropyrano[2,3-c]pyrazole-5-carbonitrile (4l)

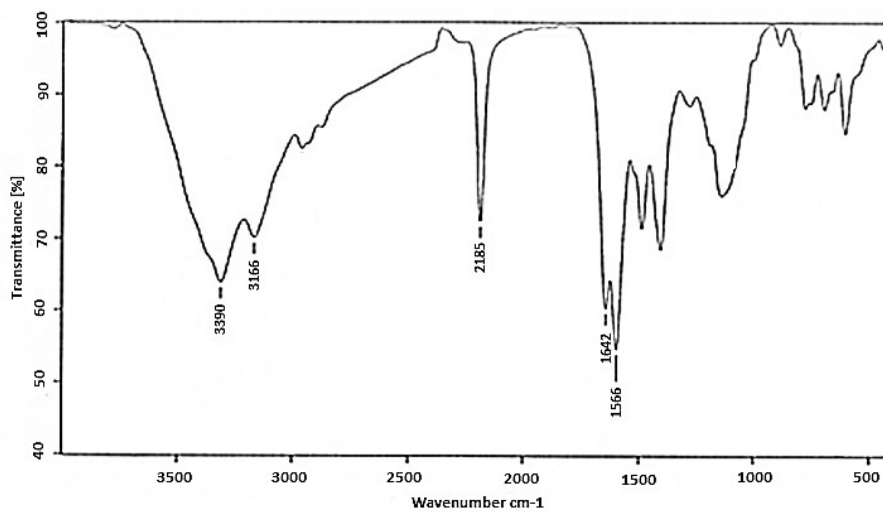

Figure 18. Ft.IR spectrum of 6-amino-3-methyl-4-(4-nitrophenyl)-1,4-dihydropyrano[2,3-c]pyrazole-5-carbonitrile (4m)

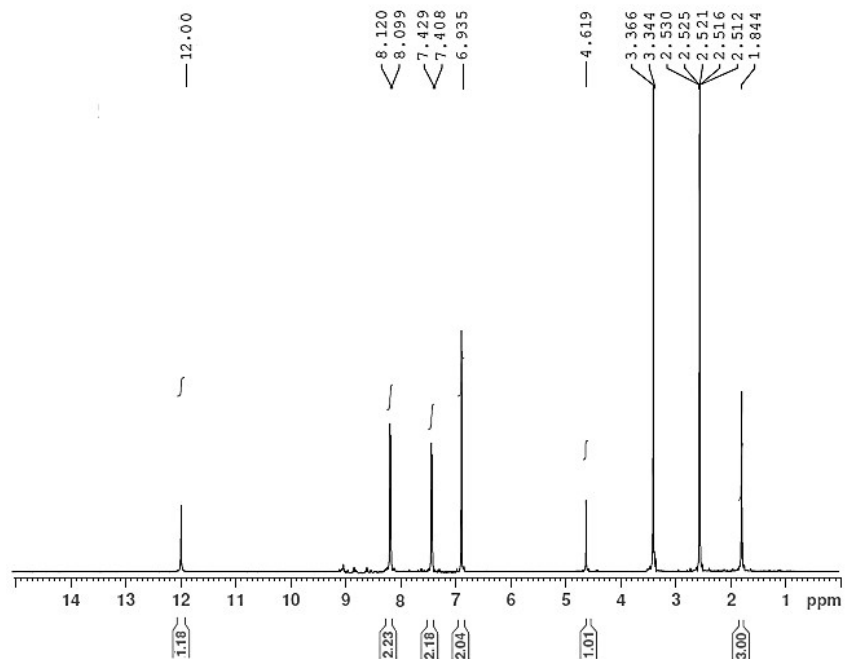

Figure 19. <sup>1</sup>H NMR spectrum of 6-amino-3-methyl-4-(4-nitrophenyl)-1,4-dihydropyrano[2,3-c]pyrazole-5-carbonitrile (4m)

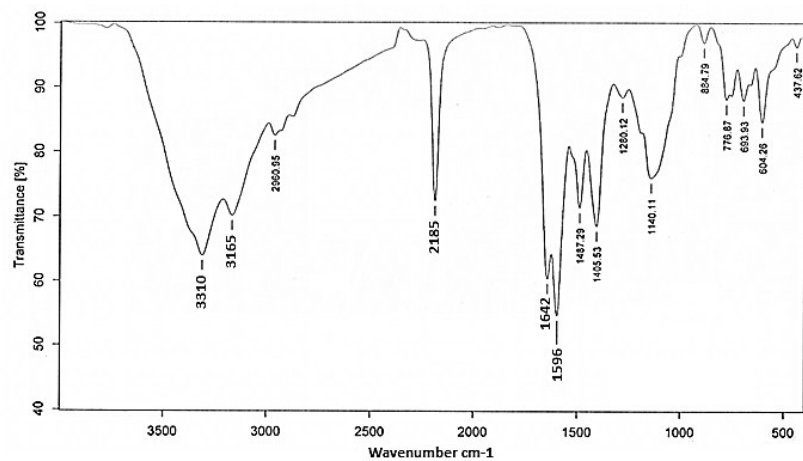

Figure 20. Ft. IR spectrum of 6-amino-4-(3-bromophenyl)-3-methyl-1,4-dihydropyrano[2,3-c]pyrazole-5-carbonitrile (4n)

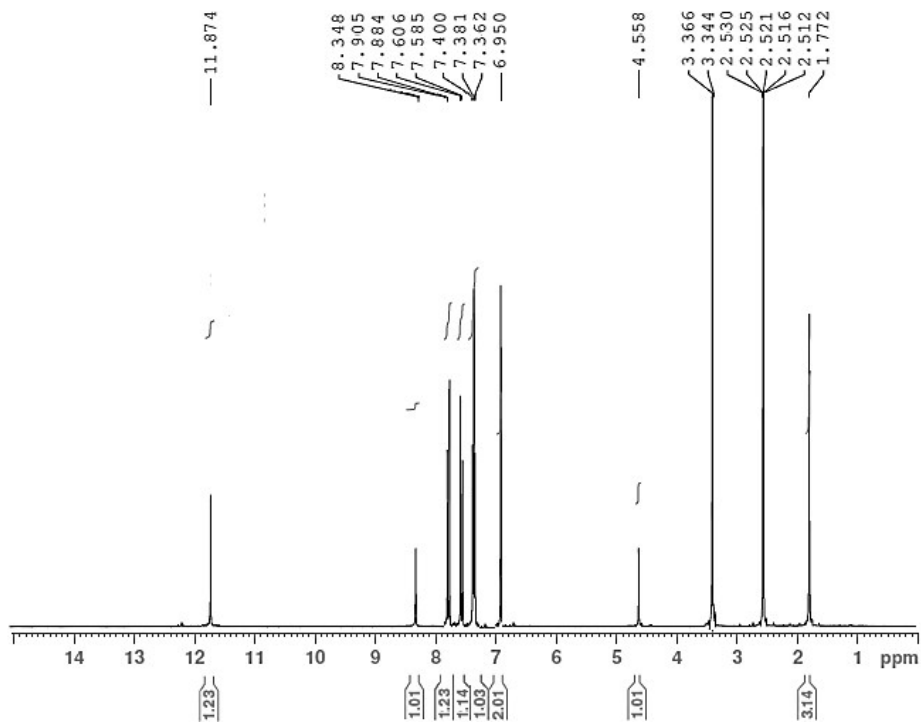

Figure 21. <sup>1</sup>H NMR spectrum of 6-amino-4-(3-bromophenyl)-3-methyl-1,4-dihydropyranopyrazole-5-carbonitrile (4n)

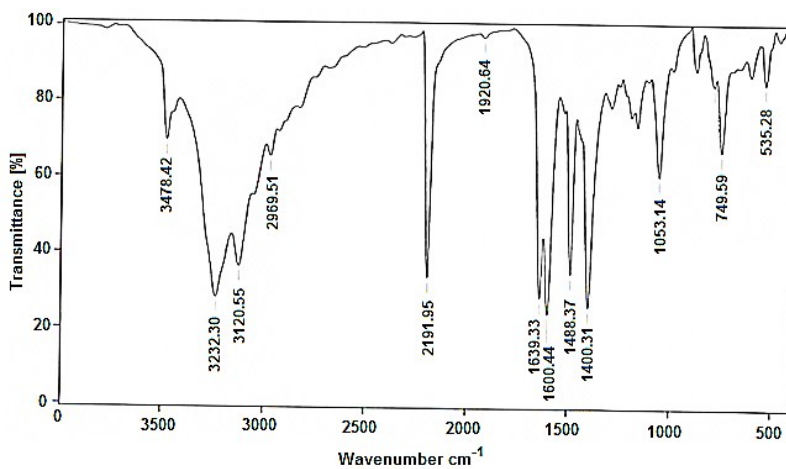

Figure 22. Ft. IR spectrum of 4,4'-(1,4-phenylene)bis(6-amino-3-methyl-1,4-dihydropyranopyrazole-5-carbonitrile) (4o)

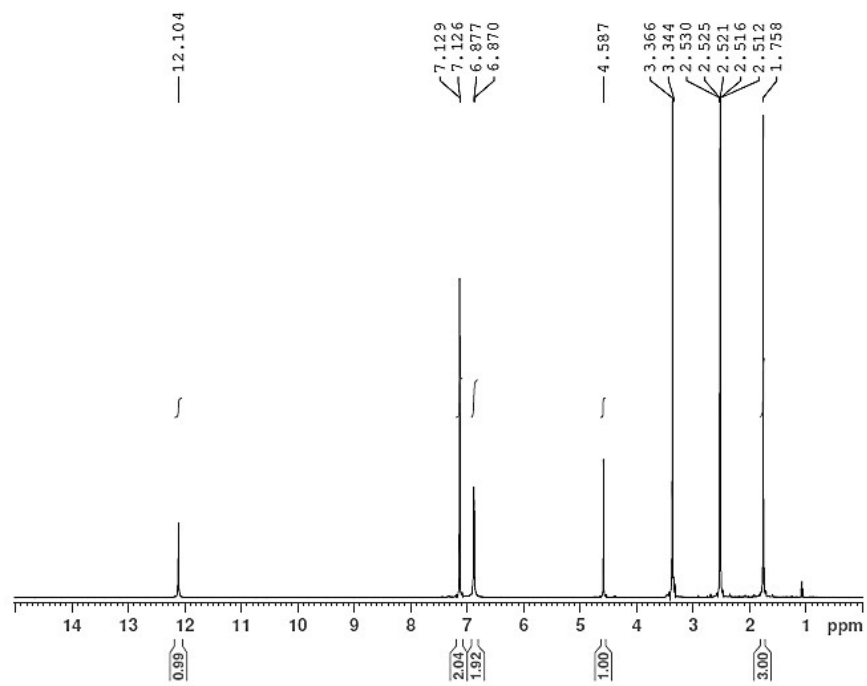

Figure 23.  $^1\text{H}$ NMR spectrum of 4,4'-(1,4-phenylene)bis(6-amino-3-methyl-1,4-dihydropyrano[2,3-c]pyrazole-5-carbonitrile) (4o)

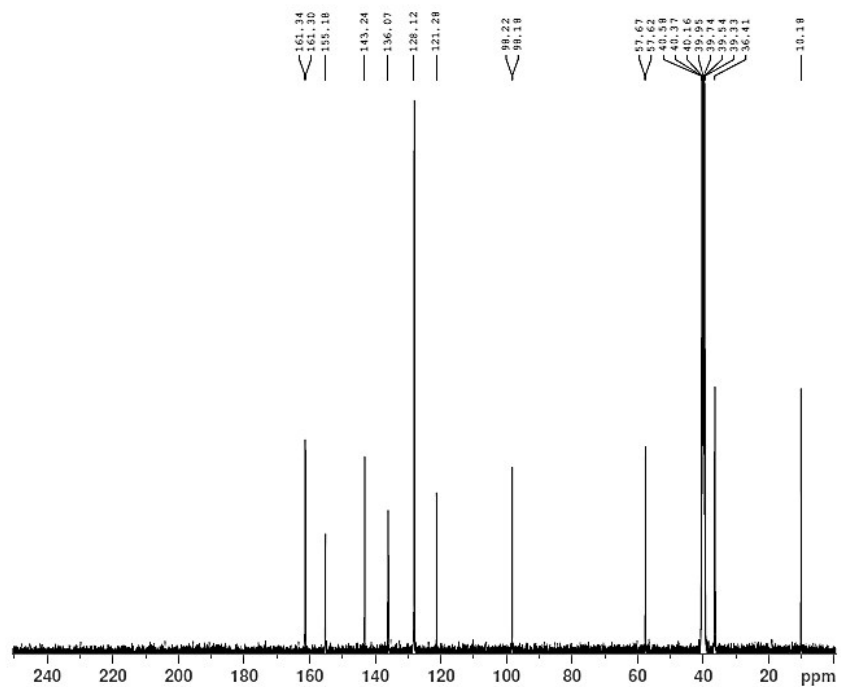

Figure 24.  $^{13}\text{C}$ NMR spectrum of 4,4'-(1,4-phenylene)bis(6-amino-3-methyl-1,4-dihydropyrano[2,3-c]pyrazole-5-carbonitrile) (4o)

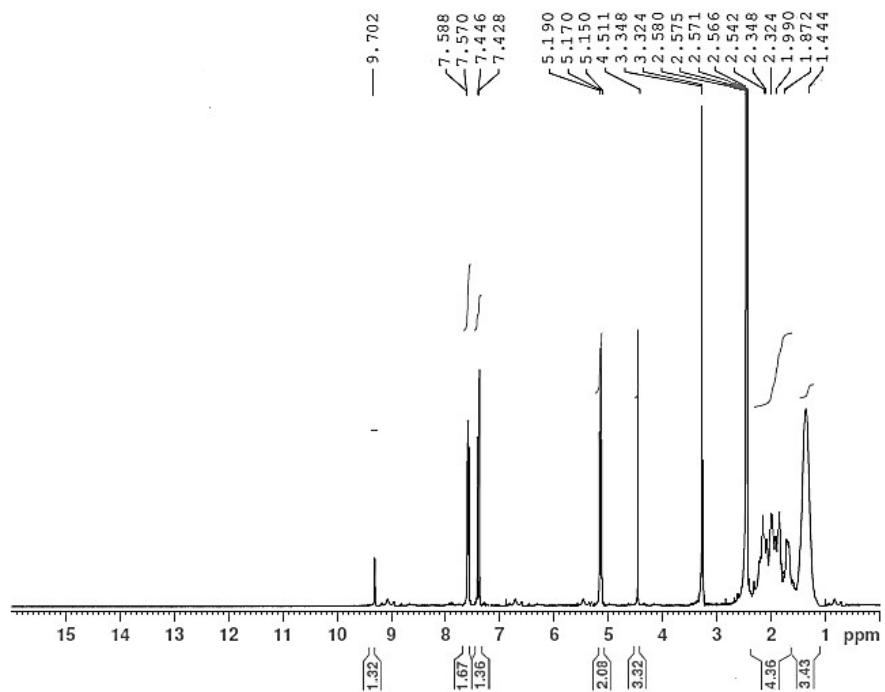

Figure 25.  $^1\text{H}$ NMR spectrum of [bmim][OH<sup>-</sup>].
